# Supplementary material for: Phenotypic characterization of paroxysmal dyskinesia in Maltese dogs
Source: PubMed Central journal article supplement (PMC7379016; doi:10.1111/jvim.15804), 2020-05-16
Supplement: JVIM-34-1541-s001.pdf [file JVIM-34-1541-s001.pdf]

**Addendum 1: Questionnaire**

Sex:

Male       Female

Date of birth:.....

Pedigree:

Yes       No

Video footage of the episode:

Yes       No

Diet the dog is currently taking (specify type and brand):

Was the dog suffering from any other condition while the episodes started?

- Hypersensitivity (allergic) skin condition       Gastrointestinal problems
- Traumatic event       Other:.....

Was the dog on any medication while the episodes started:

Yes  (specify)      No

Is there any family history with the same symptoms:

Yes       No

### **Episode's details**

#### 1) Age of onset

a) Dog's age at which you first observed an episode:

b) Date of last known episode:

#### 2) Occurrence of episodes

a) Is there any trigger able to elicit the episodes:

Stress/excitation       Happens during rest/sleep

Exercises       Noise       Other:

b) Which time of the day are the episodes more frequent:

Morning (6am-12am)       Afternoon (12am-5pm)       Evening (5pm-8pm)

Night (8pm-6am)       Random

c) What is the frequency of the episodes:

Daily       Weekly       Monthly       Other (describe):

d) In case of daily episodes, what is the frequency:

1 time       2 times       3 times       4 times       Random

### 3) Characterization of the episodes

a) Is it possible to predict the episodes?

Yes       No

b) Does the dog appear conscious during the episode:

Yes       No

c) Does the dog appear to be aware of surroundings during the episode:

Yes       No

d) Does the dog attempt to come to you during the episode:

Yes       No

e) Can you get the dogs' attention during the episode (calling/touching):

Yes       No

f) Does the dog exhibit trouble walking during the episode:

Yes (describe)       No

g) Does the dog tend to lie down during the episode:

Yes ( lateral    sternal)       No (standing)

h) Does the dog show unusual head/body movements during the episode:

Yes (describe)       No

i) Does the dog show salivation/defecation/urination during the episode:

Yes (describe)       No       Other (describe):

j) Is the dog normal after/before the episodes:

Yes       No

k) Is the dog normal between the episodes:

Ye       No

l) Which limbs are mainly affected during the episodes:

Both thoracic limbs       Both pelvic limbs       All limbs

Other (describe):

m) What is the average length of an episode:

<5 mins       5-10 mins       10-30 mins       >30 mins (describe):
